# Supplementary material for: Prognostic impact of soluble CD163 in patients with diffuse large B-cell lymphoma
Source: PubMed Central journal article supplement — Haematologica. 2021 Mar 25;106(9):2502–6. doi: 10.3324/haematol.2020.278182 (PMC8409034; doi:10.3324/haematol.2020.278182), 2021-03-25
Supplement: 2020_278182_VAJAVAARA_SUPPL.pdf [file 2020_278182_VAJAVAARA_SUPPL.pdf]

**Prognostic impact of soluble CD163 in patients with diffuse large B-cell lymphoma**

*Heli Vajavaara,<sup>1,2,3\*</sup> Frida Ekeblad,<sup>4\*</sup> Harald Holte,<sup>5</sup> Judit Jørgensen,<sup>6</sup> Suvi-Katri Leivonen,<sup>1,2,3</sup> Mattias Berglund,<sup>4</sup> Peter Kamper,<sup>6</sup> Holger J. Møller,<sup>7,8</sup> Francesco d'Amore,<sup>6,8</sup> Daniel Molin,<sup>4</sup> Gunilla Enblad,<sup>4</sup> Maja Ludvigsen,<sup>6,8</sup> Ingrid Glimelius<sup>4,9#</sup> and Sirpa Leppä<sup>1,2,3#</sup>*

*\*HV and FE contributed equally as co-first authors.*

*#IG and SL contributed equally as co-senior authors.*

*<sup>1</sup>Research Program Unit, Applied Tumor Genomics, Faculty of Medicine, University of Helsinki, Helsinki, Finland; <sup>2</sup>Department of Oncology, Helsinki University Hospital Comprehensive Cancer Center, Helsinki, Finland; <sup>3</sup>iCAN Digital Precision Cancer Medicine Flagship, Helsinki, Finland; <sup>4</sup>Experimental and Clinical Oncology, Department of Immunology, Genetics and Pathology, Uppsala University, Uppsala, Sweden; <sup>5</sup>Department of Oncology and KG Jebsen center for B-cell malignancies, Oslo University Hospital, Oslo, Norway; <sup>6</sup>Department of Hematology, Aarhus University Hospital, Aarhus, Denmark; <sup>7</sup>Department of Clinical Biochemistry, Aarhus University Hospital, Aarhus, Denmark; <sup>8</sup>Department of Clinical Medicine, Aarhus University, Aarhus, Denmark and <sup>9</sup>Department of Medicine, division of clinical epidemiology, Karolinska Institutet, Solna, Sweden*

*Correspondence: SIRPA LEPPA - [sirpa.leppa@helsinki.fi](mailto:sirpa.leppa@helsinki.fi)*

*INGRID GLIMELIUS - [ingrid.glimelius@igp.uu.se](mailto:ingrid.glimelius@igp.uu.se)*

*doi:10.3324/haematol.2020.278182*

## Supplemental material

### Prognostic impact of soluble CD163 in patients with diffuse large B-cell lymphoma

Heli Vajavaara<sup>1,2,3\*</sup>, Frida Ekeblad<sup>4\*</sup>, Harald Holte<sup>5</sup>, Judit Jørgensen<sup>6</sup>, Suvi-Katri Leivonen<sup>1,2,3</sup>, Mattias Berglund<sup>4</sup>, Peter Kamper<sup>6</sup>, Holger J. Møller<sup>7,8</sup>, Francesco d'Amore<sup>6,8</sup>, Daniel Molin<sup>4</sup>, Gunilla Enblad<sup>4</sup>, Maja Ludvigsen<sup>6,8</sup>, Ingrid Glimelius<sup>4,9#</sup>, and Sirpa Leppä<sup>1,2,3#</sup>

\*HJ and FE shared first author

# IG and SL shared last author

<sup>1</sup>Research Program Unit, Applied Tumor Genomics, Faculty of Medicine, University of Helsinki, Helsinki, Finland;

<sup>2</sup>Department of Oncology, Helsinki University Hospital Comprehensive Cancer Center, Helsinki, Finland;

<sup>3</sup>iCAN Digital Precision Cancer Medicine Flagship, Helsinki, Finland;

<sup>4</sup>Experimental and Clinical Oncology, Department of Immunology, Genetics and Pathology, Uppsala University, Uppsala, Sweden;

<sup>5</sup>Department of Oncology and KG Jebsen center for B-cell malignancies, Oslo University Hospital, Oslo, Norway; <sup>6</sup>Department of Hematology, Aarhus University Hospital, Aarhus, Denmark;

<sup>7</sup>Department of Clinical Biochemistry, Aarhus University Hospital, Aarhus, Denmark;

<sup>8</sup>Department of Clinical Medicine, Aarhus University, Aarhus, Denmark;

<sup>9</sup>Department of Medicine, division of clinical epidemiology, Karolinska Institutet, Solna, Sweden

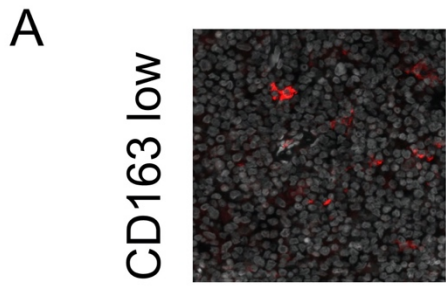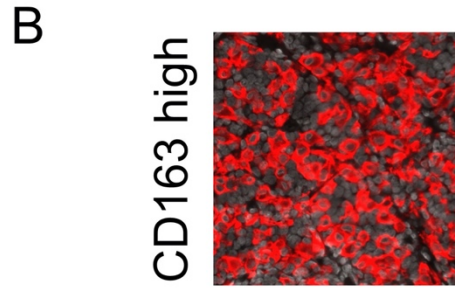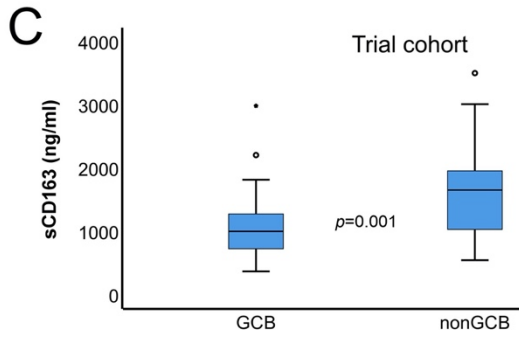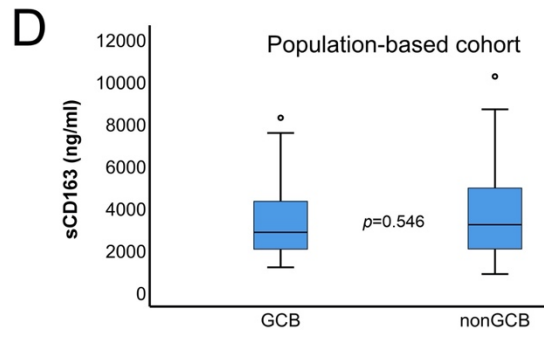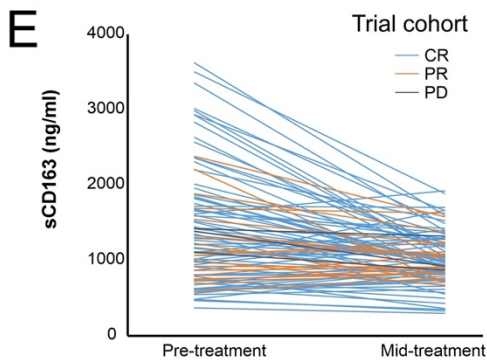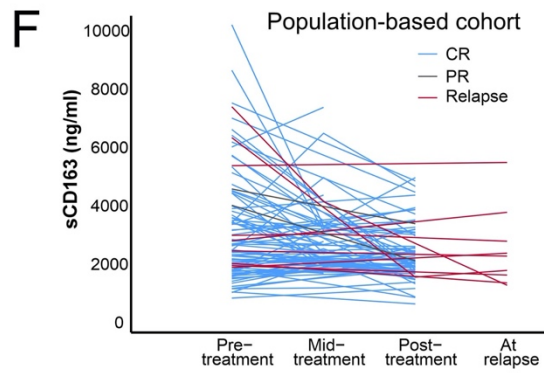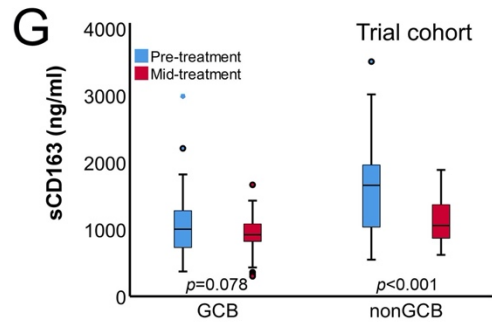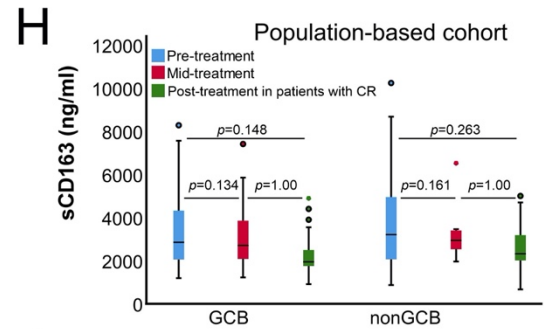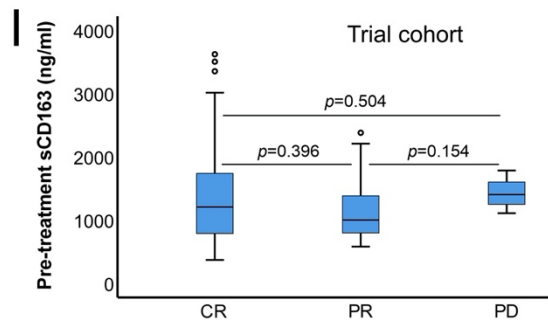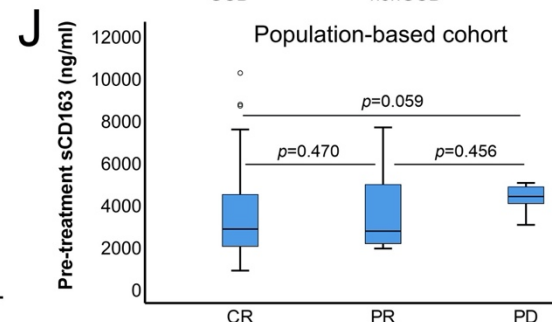

**Supplementary Figure 1. CD163 immunohistochemistry and the effect of treatment on sCD163 levels.** Representative images of immunohistochemical stainings of diffuse large B-cell lymphomas with low (A) and high (B) CD163+ cell counts. Pre-treatment sCD163 levels between the molecular subgroups (GCB vs non-GCB) in the trial cohort (C) and the population-based cohort (D). The effect of treatment on sCD163 levels for each patient separately and according to their response in the trial cohort (E) and the population-based cohort (F). Comparison of pre- and mid-treatment sCD163 levels according to molecular subgroups in the trial cohort (G), and comparison of pre-, mid-, and post-treatment in CR sCD163 levels according to subgroups in the population-based cohort (H). Comparison of pre-treatment sCD163 levels in patients with complete response (CR), partial response (PR) or progressive disease (PD) at the end of treatment in the trial cohort (I) and the population-based cohort (J). Due to graphical reasons the two extreme outliers in the population-based cohort with pre-treatment sCD163 level over 11 000 ng/ml are not visualized in the figures, but are included in the statistical analyses.

**Supplementary Table 1. Cox regression analysis in the trial cohort**

| Factor                   | PFS         |                   |                 | OS   |            |                 |
|--------------------------|-------------|-------------------|-----------------|------|------------|-----------------|
|                          | HR          | 95% CI            | <i>p</i> -value | HR   | 95% CI     | <i>p</i> -value |
| sCD163, low vs. high     | <b>4.40</b> | <b>1.09-17.83</b> | <b>0.038</b>    | 5.08 | 0.98-26.39 | 0.053           |
| Age, < vs. ≥ 60 years    | 1.05        | 0.31-3.64         | 0.935           | 0.52 | 0.11-2.41  | 0.403           |
| Stage, I-IV              | 1.97        | 0.49-7.87         | 0.336           | 1.43 | 0.35-5.89  | 0.623           |
| ECOG PS, 0-4             | 1.50        | 0.73-3.07         | 0.267           | 2.10 | 0.89-4.97  | 0.093           |
| LDH, ≤ ULN vs. > ULN     | 1.64        | 0.19-14.14        | 0.652           | 1.85 | 0.22-15.96 | 0.575           |
| Gender, male vs. female  | 0.81        | 0.24-2.72         | 0.735           | 1.43 | 0.38-5.37  | 0.596           |
| Subtype, GCB vs. non-GCB | 0.83        | 0.26-2.70         | 0.762           | 1.02 | 0.26-4.03  | 0.973           |

Cox regression analysis regarding the prognostic implication on progression-free survival and overall survival according to pre-treatment sCD163 levels in the trial cohort. PFS, progression free survival; OS, overall survival; HR, hazard ratio; CI, confidence interval; sCD163, soluble CD163; ECOG PS, Eastern Cooperative Oncology Group performance status; LDH, lactate dehydrogenase; ULN, upper limit of normal; GCB, Germinal center B-cell like; non-GCB, non-germinal center B-cell like. Significant values are indicated in bold.

**Supplementary Table 2. Cox regression analysis in the population-based cohort**

| Factor         | PFS         |                   |              | OS          |                   |              |
|----------------|-------------|-------------------|--------------|-------------|-------------------|--------------|
|                | HR          | 95% CI            | p-value      | HR          | 95% CI            | p-value      |
| sCD163 low     |             | <i>reference</i>  |              |             | <i>reference</i>  |              |
| sCD163 high*   | <b>2.16</b> | <b>1.05-4.48</b>  | <b>0.037</b> | 2.21        | 0.99-4.94         | 0.052        |
| Age < 60 years |             | <i>reference</i>  |              |             | <i>reference</i>  |              |
| Age > 60 years | <b>3.20</b> | <b>1.31-7.77</b>  | <b>0.010</b> | <b>5.81</b> | <b>1.74-19.36</b> | <b>0.004</b> |
| Stage I        |             | <i>reference</i>  |              |             | <i>reference</i>  |              |
| Stage II       | 0.58        | 0.18-1.89         | 0.368        | 0.50        | 0.13-1.89         | 0.309        |
| Stage III      | 0.98        | 0.39-2.47         | 0.971        | 1.10        | 0.41-2.93         | 0.852        |
| Stage IV       | 0.61        | 0.25-1.50         | 0.282        | 0.54        | 0.20-1.47         | 0.227        |
| ECOG PS 0-1    |             | <i>reference</i>  |              |             | <i>reference</i>  |              |
| ECOG PS 2-3    | <b>3.86</b> | <b>1.49-10.02</b> | <b>0.006</b> | <b>5.57</b> | <b>2.01-15.40</b> | <b>0.001</b> |
| LDH ≤ ULN      |             | <i>reference</i>  |              |             | <i>reference</i>  |              |
| LDH > ULN      | 1.86        | 0.95-3.64         | 0.072        | <b>2.12</b> | <b>1.00-4.48</b>  | <b>0.049</b> |
| Male           |             | <i>reference</i>  |              |             | <i>reference</i>  |              |
| Female         | <b>0.38</b> | <b>0.19-0.75</b>  | <b>0.006</b> | <b>0.42</b> | <b>0.20-0.90</b>  | <b>0.025</b> |

Multivariable Cox regression analysis regarding the prognostic implication on progression-free survival and overall survival according to pre-treatment sCD163 levels in the population-based cohort. PFS, progression-free survival; OS, overall survival; HR, hazard ratio; CI, confidence interval; sCD163, soluble CD163; ECOG PS, Eastern Cooperative Oncology Group performance status; LDH, lactate dehydrogenase; ULN, upper limit of normal.

\*sCD163 results are adjusted for all variables included in the table (age, stage, ECOG PS, LDH and gender). Subtype was left out of the model due to missing values in 37 individuals (30%) of the cohort. Significant values are indicated in bold.
